# Supplementary material for: Revised ISHAM-ABPA working group clinical practice guidelines for diagnosing, classifying and treating allergic bronchopulmonary aspergillosis/mycoses
Source: PubMed Central journal article supplement — Eur Respir J. 2024 Apr 4;63(4):2400061. doi: 10.1183/13993003.00061-2024 (PMC10991853; doi:10.1183/13993003.00061-2024), 2024-04-04

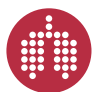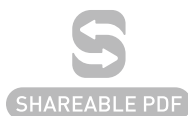

# Revised ISHAM-ABPA working group clinical practice guidelines for diagnosing, classifying and treating allergic bronchopulmonary aspergillosis/mycoses

Ritesh Agarwal<sup>1</sup>, Inderpaul Singh Sehgal<sup>1</sup>, Valliappan Muthu<sup>1</sup>, David W. Denning<sup>2</sup>, Arunaloke Chakrabarti<sup>3</sup>, Kathirvel Soundappan<sup>4</sup>, Mandeep Garg<sup>5</sup>, Shivaprakash M. Rudramurthy<sup>6</sup>, Sahajal Dhooria<sup>1</sup>, Darius Armstrong-James<sup>7</sup>, Koichiro Asano<sup>8</sup>, Jean-Pierre Gangneux<sup>9,10,11</sup>, Sanjay H. Chotirmall<sup>12</sup>, Helmut J.F. Salzer<sup>13</sup>, James D. Chalmers<sup>14</sup>, Cendrine Godet<sup>15</sup>, Marcus Joest<sup>16</sup>, Iain Page<sup>17</sup>, Parameswaran Nair<sup>18</sup>, P. Arjun<sup>19</sup>, Raja Dhar<sup>20</sup>, Kana Ram Jat<sup>21</sup>, Geethu Joe<sup>22</sup>, Uma Maheswari Krishnaswamy<sup>23</sup>, Joseph L. Mathew<sup>24</sup>, Venkata Nagarjuna Maturu<sup>25</sup>, Anant Mohan<sup>26</sup>, Alok Nath<sup>27</sup>, Dharmesh Patel<sup>28</sup>, Jayanthi Savio<sup>29</sup>, Puneet Saxena<sup>30</sup>, Rajeev Soman<sup>31</sup>, Balamugesh Thangakunam<sup>32</sup>, Caroline G. Baxter<sup>33</sup>, Felix Bongomin<sup>34,35</sup>, William J. Calhoun<sup>36</sup>, Oliver A. Cornely<sup>37</sup>, Jo A. Douglass<sup>38</sup>, Chris Kosmidis<sup>39</sup>, Jacques F. Meis<sup>37,40</sup>, Richard Moss<sup>41</sup>, Alessandro C. Pasqualotto<sup>42,43</sup>, Danila Seidel<sup>44</sup>, Rosanne Sprute<sup>37</sup>, Kuruswamy Thurai Prasad<sup>1</sup> and Ashutosh N. Aggarwal<sup>1</sup>

<sup>1</sup>Department of Pulmonary Medicine, Postgraduate Institute of Medical Education and Research, Chandigarh, India. <sup>2</sup>The University of Manchester, Manchester UK. <sup>3</sup>Doodhadhari Burfani Hospital, Haridwar, India. <sup>4</sup>Department of Community Medicine and School of Public Health, Postgraduate Institute of Medical Education and Research, Chandigarh, India. <sup>5</sup>Department of Radiodiagnosis and Imaging, Postgraduate Institute of Medical Education and Research, Chandigarh, India. <sup>6</sup>Department of Medical Microbiology, Postgraduate Institute of Medical Education and Research, Chandigarh, India. <sup>7</sup>Faculty of Medicine, Department of Infectious Disease, Imperial College London, London, UK. <sup>8</sup>Division of Pulmonary Medicine, Department of Medicine, Tokai University School of Medicine, Kanagawa, Japan. <sup>9</sup>Université Rennes, CHU Rennes, Inserm, EHESP, Irset (Institut de recherche en santé, environnement et travail), UMR\_S 1085, Rennes, France. <sup>10</sup>CHU Rennes, Laboratoire de Parasitologie-Mycologie, ECMM Excellence Center in Medical Mycology, Rennes, France. <sup>11</sup>National Reference Center on Mycoses and Antifungals (CNRMA LA-Asp C), Rennes, France. <sup>12</sup>Lee Kong Chian School of Medicine, Nanyang Technological University (NTU) and Department of Respiratory and Critical Care Medicine, Tan Tock Seng Hospital, Singapore, Singapore. <sup>13</sup>Division of Infectious Diseases and Tropical Medicine, Department of Internal Medicine-Pneumology, Kepler University Hospital and Medical Faculty, Johannes Kepler University, Linz, Austria. <sup>14</sup>School of Medicine, University of Dundee, Dundee, UK. <sup>15</sup>Université Paris Sorbonne, AP-HP, Hôpital Tenon, Service de Pneumologie et Oncologie Thoracique, Centre Constitutif Maladies Pulmonaires Rares Paris, Paris, France. <sup>16</sup>Helios Lung and Allergy Centre, Bonn, Germany. <sup>17</sup>NHS Lothian, Regional Infectious Diseases Unit, Western General Hospital, Edinburgh, UK. <sup>18</sup>McMaster University, McGill University, St Joseph's Healthcare Hamilton, Hamilton, ON, Canada. <sup>19</sup>KIMS Hospital, Trivandrum, India. <sup>20</sup>Department of Pulmonology, CK Birla Hospitals, Kolkata, India. <sup>21</sup>Division of Pediatric Pulmonology, Department of Pediatrics, All India Institute of Medical Sciences, New Delhi, India. <sup>22</sup>Jupiter Hospital, Pune, India. <sup>23</sup>Department of Pulmonary Medicine, St John's Medical College and Hospital, Bengaluru, India. <sup>24</sup>Pediatric Pulmonology Division, Department of Pediatrics, Postgraduate Institute of Medical Education and Research, Chandigarh, India. <sup>25</sup>Department of Pulmonary Medicine, Yashoda Hospitals, Hyderabad, India. <sup>26</sup>Department of Pulmonary, Critical Care and Sleep Medicine, All India Institute of Medical Sciences, New Delhi, India. <sup>27</sup>Department of Pulmonary Medicine, Sanjay Gandhi Postgraduate Institute, Lucknow, India. <sup>28</sup>City Clinic and Bhailal Amin General Hospital, Vadodara, India. <sup>29</sup>Department of Microbiology, St John's Medical College and Hospital, Bengaluru, India. <sup>30</sup>Pulmonary and Critical Care Medicine, Army Hospital (R&R), New Delhi, India. <sup>31</sup>Department of Infectious Diseases, Jupiter Hospital, Pune, India. <sup>32</sup>Department of Pulmonary Medicine, Christian Medical College, Vellore, India. <sup>33</sup>Department of Respiratory Medicine, Manchester University NHS Foundation Trust, Manchester, UK. <sup>34</sup>Department of Medical Microbiology and Immunology, Faculty of Medicine, Gulu University, Gulu, Uganda. <sup>35</sup>Manchester Fungal Infection Group, Division of Evolution, Infection and Genomics, Faculty of Biology, Medicine and Health, University of Manchester, Manchester, UK. <sup>36</sup>Department of Internal Medicine, University of Texas Medical Branch, Galveston, TX, USA. <sup>37</sup>Institute of Translational Research, Cologne Excellence Cluster on Cellular Stress Responses in Aging-Associated Diseases (CECAD), Excellence Center for Medical Mycology (ECMM), University of Cologne, Cologne, Germany. <sup>38</sup>University of Melbourne, Royal Melbourne Hospital, Parkville, Australia. <sup>39</sup>Division of Evolution, Infection and Genomics, University of Manchester, Manchester University NHS Foundation Trust, Manchester, UK. <sup>40</sup>Center of Expertise in Mycology Radboudumc/CWZ Nijmegen, Nijmegen, The Netherlands. <sup>41</sup>Center of Excellence in Pulmonary Biology, Division of Pulmonary, Asthma and Sleep Medicine, Department of Pediatrics, Stanford University School of Medicine, Palo Alto, CA, USA. <sup>42</sup>Molecular Biology Laboratory, Santa Casa de Misericórdia de Porto Alegre, Porto Alegre, Brazil. <sup>43</sup>Federal University of Health Sciences of Porto Alegre, Porto Alegre, Brazil. <sup>44</sup>Department of Internal Medicine, University Hospital, Cologne, Germany.

Corresponding author: Ritesh Agarwal ([agarwal.ritesh@outlook.in](mailto:agarwal.ritesh@outlook.in))

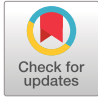

Shareable abstract (@ERSpublications)

The International Society for Human and Animal Mycology working group convened an international expert group that has framed simple guidelines for diagnosing, classifying and treating ABPA/M for patient care and research using a modified Delphi method <https://bit.ly/3l2KlGj>

**Cite this article as:** Agarwal R, Sehgal IS, Muthu V, *et al.* Revised ISHAM-ABPA working group clinical practice guidelines for diagnosing, classifying and treating allergic bronchopulmonary aspergillosis/mycoses. *Eur Respir J* 2024; 63: 2400061 [DOI: 10.1183/13993003.00061-2024].

This extracted version can be shared freely online.

Copyright ©The authors 2024.

This version is distributed under the terms of the Creative Commons Attribution Non-Commercial Licence 4.0. For commercial reproduction rights and permissions contact [permissions@ersnet.org](mailto:permissions@ersnet.org)

Received: 9 Jan 2024

Accepted: 9 Feb 2024

### Abstract

**Background** The International Society for Human and Animal Mycology (ISHAM) working group proposed recommendations for managing allergic bronchopulmonary aspergillosis (ABPA) a decade ago. There is a need to update these recommendations due to advances in diagnostics and therapeutics.

**Methods** An international expert group was convened to develop guidelines for managing ABPA (caused by *Aspergillus* spp.) and allergic bronchopulmonary mycosis (ABPM; caused by fungi other than *Aspergillus* spp.) in adults and children using a modified Delphi method (two online rounds and one in-person meeting). We defined consensus as  $\geq 70\%$  agreement or disagreement. The terms “recommend” and “suggest” are used when the consensus was  $\geq 70\%$  and  $< 70\%$ , respectively.

**Results** We recommend screening for *A. fumigatus* sensitisation using fungus-specific IgE in all newly diagnosed asthmatic adults at tertiary care but only difficult-to-treat asthmatic children. We recommend diagnosing ABPA in those with predisposing conditions or compatible clinico-radiological presentation, with a mandatory demonstration of fungal sensitisation and serum total IgE  $\geq 500$  IU·mL<sup>-1</sup> and two of the following: fungal-specific IgG, peripheral blood eosinophilia or suggestive imaging. ABPM is considered in those with an ABPA-like presentation but normal *A. fumigatus*-IgE. Additionally, diagnosing ABPM requires repeated growth of the causative fungus from sputum. We do not routinely recommend treating asymptomatic ABPA patients. We recommend oral prednisolone or itraconazole monotherapy for treating acute ABPA (newly diagnosed or exacerbation), with prednisolone and itraconazole combination only for treating recurrent ABPA exacerbations. We have devised an objective multidimensional criterion to assess treatment response.

**Conclusion** We have framed consensus guidelines for diagnosing, classifying and treating ABPA/M for patient care and research.

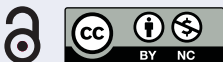

Supplement: ERJ-00061-2024.Shareable.pdf [file ERJ-00061-2024.Shareable.pdf]
