# Supplementary material for: Revised ISHAM-ABPA working group clinical practice guidelines for diagnosing, classifying and treating allergic bronchopulmonary aspergillosis/mycoses
Source: PubMed Central journal article supplement — Eur Respir J. 2024 Apr 4;63(4):2400061. doi: 10.1183/13993003.00061-2024 (PMC10991853; doi:10.1183/13993003.00061-2024), 2024-04-04

Table S1: Profile of the experts participating in the International Society for Human and Animal Mycology (ISHAM) allergic bronchopulmonary aspergillosis (ABPA) working group (n=39)

| <b>Variables</b>                                   | <b>Results</b> |
|----------------------------------------------------|----------------|
| Age, years (range)                                 | 34-73          |
| <b>Sex</b>                                         |                |
| Men                                                | 33 (84.6)      |
| Women                                              | 6 (15.4)       |
| <b>Country</b>                                     |                |
| India                                              | 19 (48.7)      |
| United Kingdom                                     | 6 (15.4)       |
| Germany                                            | 3 (7.7)        |
| France                                             | 2 (5.1)        |
| Australia                                          | 1 (2.6)        |
| Austria                                            | 1 (2.6)        |
| Brazil                                             | 1 (2.6)        |
| Canada                                             | 1 (2.6)        |
| Japan                                              | 1 (2.6)        |
| Netherlands                                        | 1 (2.6)        |
| Singapore                                          | 1 (2.6)        |
| Uganda                                             | 1 (2.6)        |
| United States                                      | 1 (2.6)        |
| <b>Specialty</b>                                   |                |
| Adult Pulmonary Medicine                           | 19 (48.7)      |
| Infectious Disease                                 | 9 (23.1)       |
| Microbiology                                       | 5 (12.8)       |
| Allergy-Immunology                                 | 2 (5.1)        |
| Pediatric Pulmonology                              | 2 (5.1)        |
| Radiodiagnosis                                     | 1 (2.6)        |
| Community Medicine/Public Health                   | 1 (2.6)        |
| <b>Affiliation</b>                                 |                |
| University or teaching hospital                    | 33 (85)        |
| Private practitioner                               | 4 (10)         |
| Laboratory practice                                | 2 (5)          |
| <b>Clinical experience in managing ABPA, years</b> |                |
| 1-5                                                | 3 (7.7)        |
| 6-10                                               | 5 (12.8)       |
| 11-15                                              | 9 (23.1)       |
| >15                                                | 19 (48.7)      |
| Not applicable                                     | 3 (7.7)        |
| <b>Experience in managing cystic fibrosis-ABPA</b> | 20 (51.3)      |
| <b>Number of asthma patients managed per month</b> |                |
| <10                                                | 6 (15.4)       |
| 10 to 50                                           | 14 (35.9)      |
| 51 to 100                                          | 6 (15.4)       |
| >100                                               | 7 (17.9)       |
| Not applicable                                     | 6 (15.4)       |
| <b>Number of ABPA patients managed per month</b>   |                |
| 1 to 5                                             | 12 (30.8)      |
| 6 to 10                                            | 12 (30.8)      |
| 11 to 20                                           | 5 (12.8)       |
| 21 to 50                                           | 3 (7.7)        |
| >50                                                | 1 (2.6)        |
| None/Not applicable                                | 6 (15.4)       |

All values are presented as numbers (percentage) unless otherwise specified



Table S2: Questions discussed in the Delphi process and the scores obtained (for the statements not achieving consensus in rounds 1 and 2, we used the level of consensus achieved during the final round)

|                                                                                                                        |                                                                               | Round 1       | Round 2       | Round 3 |
|------------------------------------------------------------------------------------------------------------------------|-------------------------------------------------------------------------------|---------------|---------------|---------|
| <b>FUNGAL SENSITIZATION</b>                                                                                            |                                                                               |               |               |         |
| 1. Which fungi do you suggest screening for fungal sensitization? (Choose all that you regard as routine)              | <i>Aspergillus fumigatus</i>                                                  | 37/39 (94.9%) | -             | -       |
|                                                                                                                        | <i>A. flavus</i>                                                              | 24/39 (61.5%) | 24/39 (61.5%) |         |
|                                                                                                                        | <i>Candida albicans</i>                                                       | 15/39 (38.5%) | 24/39 (61.5%) |         |
|                                                                                                                        | <i>Alternaria spp.</i>                                                        | 24/39 (61.5%) | 24/39 (61.5%) |         |
|                                                                                                                        | <i>Cladosporium spp.</i>                                                      | 24/39 (61.5%) | 15/39 (38.5%) |         |
|                                                                                                                        | <i>Trichophyton spp.</i>                                                      | 13/39 (33.3%) | 13/39 (33.3%) |         |
|                                                                                                                        | Other (please list)                                                           | 5/39 (12.8%)  | 5/39 (12.8%)  |         |
| 2. In which of the following situations would you suggest screening for fungal sensitization?                          | 1. All newly referred or newly diagnosed adult asthmatics                     | 18/39 (46.2%) | 25/35 (71.4%) |         |
|                                                                                                                        | 2. All newly referred or newly diagnosed children (aged >5 years) with asthma | 12/39 (30.8%) | 10/37 (27%)   |         |
|                                                                                                                        | 3. All children with asthma referred to or managed at tertiary care           | 22/39 (56.4%) | 27/37 (73%)   |         |
|                                                                                                                        | 3. Uncontrolled asthma                                                        | 35/39 (89.7%) | -             |         |
|                                                                                                                        | 4. Difficult to treat asthma                                                  | 36/39 (92.3%) | -             |         |
|                                                                                                                        | 5. Severe asthma                                                              | 36/39 (92.3%) | -             |         |
|                                                                                                                        | 6. Peripheral eosinophilia                                                    | 26/39 (66.7%) | -             |         |
| 7. Any other                                                                                                           | 4/39 (10.3%)                                                                  | -             |               |         |
| 3. Which method do you prefer for documenting fungal sensitization?                                                    | Fungal-specific IgE                                                           | 26/34 (76.5%) | -             |         |
|                                                                                                                        | Skin prick test                                                               | 1/34 (2.9%)   | -             |         |
|                                                                                                                        | Both                                                                          | 11/34 (32.3%) | -             |         |
| 4. In which of the following situations would you suggest evaluating adults for ABPA? (Choose all that is appropriate) | 1. All asthmatic adults managed or diagnosed at primary or secondary care     | 20/39 (51.2%) | 25/35 (71.4%) |         |
|                                                                                                                        | 2. All adults with asthma referred to or managed at tertiary care             | 23/39 (59%)   | 23/35 (65.7%) |         |
|                                                                                                                        | 3. Uncontrolled asthma                                                        | 34/39 (87.2%) | -             |         |
|                                                                                                                        | 4. Difficult to treat asthma                                                  | 36/39 (92.3%) | -             |         |
|                                                                                                                        | 5. Severe asthma                                                              | 36/39 (92.3%) | -             |         |
|                                                                                                                        | 6. Peripheral eosinophilia                                                    | 27/39 (69.2%) | -             |         |
|                                                                                                                        | 7. Others                                                                     | 6/39 (15.4%)  | -             |         |
| 5. In which of the following situations would you suggest evaluating                                                   | 1. All asthmatic children (aged >5 years) managed or diagnosed at diagnosed   | 4/39 (10.3%)  | -             |         |

|                                                                                                                          |                                                                                     |               |               |   |
|--------------------------------------------------------------------------------------------------------------------------|-------------------------------------------------------------------------------------|---------------|---------------|---|
| children for ABPA? (Choose all that is appropriate)                                                                      | primary or secondary care                                                           |               |               |   |
|                                                                                                                          | 2. All children with asthma (aged >5 years) referred to or managed at tertiary care | 17/39 (43.6%) | 27/37 (73%)   |   |
|                                                                                                                          | 3. Uncontrolled asthma                                                              | 30/39 (76.9%) | -             |   |
|                                                                                                                          | 4. Difficult to treat asthma                                                        | 31/39 (79.5%) | -             |   |
|                                                                                                                          | 5. Severe asthma                                                                    | 22/39 (56.4%) | 20/37 (54.1%) |   |
|                                                                                                                          | 6. Peripheral eosinophilia                                                          | 6/39 (15.4%)  | -             |   |
| 6. Which method do you prefer for screening asthmatic patients for ABPA? (Please choose one)                             | <i>A. fumigatus</i> specific IgE                                                    | 37/39 (94.9%) | -             |   |
|                                                                                                                          | <i>Aspergillus</i> skin test                                                        | 0             | -             |   |
|                                                                                                                          | Serum total IgE                                                                     | 8/39 (20.5%)  | -             |   |
|                                                                                                                          | <i>A. fumigatus</i> -specific IgG                                                   | 2/39 (5.2%)   | -             |   |
|                                                                                                                          | <i>Aspergillus</i> precipitins                                                      | 1/39 (2.6%)   | -             |   |
|                                                                                                                          | Peripheral blood eosinophil count                                                   | 0             | -             |   |
|                                                                                                                          | Sputum for <i>Aspergillus</i> culture                                               | 0             | -             |   |
|                                                                                                                          | Chest radiograph                                                                    | 0             | -             |   |
|                                                                                                                          | CT chest                                                                            | 1/39 (2.6%)   | -             |   |
| Any other test (please specify)                                                                                          | 1/39 (2.6%)                                                                         | -             |               |   |
| 7. Would you recommend evaluating/screening <u>all</u> complex/difficult/brittle asthmatic adults for ABPA periodically? | Yes, alternate years.                                                               | 5/36 (13.9%)  | 8/37 (21.6%)  | - |
|                                                                                                                          | Yes, annually.                                                                      | 13/36 (36.1%) | 12/37 (32.4%) |   |
|                                                                                                                          | Only if there is a significant deterioration in asthma control                      | 18/36 (50.0%) | 17/37 (45.9%) |   |
| <b>8. INVESTIGATIONS FOR ABPA</b>                                                                                        |                                                                                     |               |               |   |
| <i>Aspergillus</i> skin test                                                                                             | Yes                                                                                 | 22/39 (56.4%) | 22/39 (56.4%) |   |
| <i>Aspergillus</i> precipitins                                                                                           | Yes                                                                                 | 15/39 (38.5%) | 13/39 (33.3%) |   |
| Serum total IgE, IU/ml                                                                                                   | Yes                                                                                 | 35/39 (89.7%) | -             |   |
| <i>A. fumigatus</i> -specific IgE, kUA/L                                                                                 | Yes                                                                                 | 37/39 (94.9%) | -             |   |
| <i>A. fumigatus</i> -specific IgG, mgA/L                                                                                 | Yes                                                                                 | 32/39 (82.1%) | -             |   |
| Blood eosinophil count, cells/ $\mu$ L                                                                                   | Yes                                                                                 | 34/39 (87.2%) | -             |   |
| Sputum fungal cultures                                                                                                   | Yes                                                                                 | 23/39 (59.0%) | 24/39 (61.5%) |   |
| Serum galactomannan                                                                                                      | No                                                                                  | 36/39 (92.3%) | -             |   |
| IgE against recombinant <i>Aspergillus</i> antigens                                                                      |                                                                                     |               |               |   |
| f1                                                                                                                       | Yes                                                                                 | 15/39 (38.5%) | 16/39 (41%)   |   |
| f2                                                                                                                       | Yes                                                                                 | 16/39 (41%)   | 16/39 (41%)   |   |
| f3                                                                                                                       | Yes                                                                                 | 8/39 (20.5%)  | -             |   |

|                                                                            |                |               |               |
|----------------------------------------------------------------------------|----------------|---------------|---------------|
| f4                                                                         | Yes            | 13/39 (33.3%) | 13/39 (33.3%) |
| f6                                                                         | Yes            | 10/39 (25.6%) | -             |
| <i>Aspergillus</i> PCR in sputum                                           | Yes            | 3/39 (7.7%)   | -             |
| <b>9. Cut-off values</b>                                                   |                |               |               |
| <i>A.fumigatus</i> -specific IgE (kUA/L)                                   |                |               |               |
| 0.1                                                                        | Yes            | 1/38 (2.6%)   |               |
| 0.35                                                                       | Yes            | 34/38 (89.5%) | -             |
| 0.5                                                                        | Yes            | 1/38 (2.6%)   |               |
| Other cut-offs                                                             | Yes            | 2/38 (5.3%)   |               |
| Serum total IgE (IU/mL)                                                    |                |               |               |
| 417                                                                        | Yes            | 2/38 (5.3%)   | 2/38 (5.3%)   |
| 500                                                                        | Yes            | 23/38 (60.5%) | 22/38 (57.9%) |
| 1000                                                                       | Yes            | 12/38 (31.6%) | 13/38 (34.2%) |
| <i>A.fumigatus</i> -specific IgG (mgA/L)                                   |                |               |               |
| 27                                                                         | Yes            | 16/35 (45.7%) | 16/35 (45.7%) |
| 40                                                                         | Yes            | 10/35 (28.6%) | 11/35 (31.4%) |
| 60                                                                         | Yes            | 2/35 (5.7%)   | 2/35 (5.7%)   |
| Other cut-offs                                                             | Yes            | 7/35 (20.0%)  | 6/35 (17.1%)  |
| Peripheral blood eosinophil count (cells/ $\mu$ L)                         |                |               |               |
| 300                                                                        | Yes            | 5/37 (13.5%)  |               |
| 500                                                                        | Yes            | 27/37 (73.0%) | -             |
| 1000                                                                       | Yes            | 5/37 (13.5%)  |               |
| Imaging                                                                    |                |               |               |
| Chest radiograph                                                           | Yes            | 24/39 (61.5%) | -             |
| CT chest                                                                   | Yes            | 36/39 (92.3%) | -             |
| MRI thorax                                                                 | Yes            | 0             | -             |
| <b>10. Bronchoscopy for ABPA</b>                                           |                |               |               |
| Do you recommend performing bronchoscopy in ABPA patients for diagnosis?   | No             | 31/36 (86.1%) | -             |
| Do you perform bronchoscopy in the evaluation/management of ABPA patients? | Yes, sometimes | 30/35 (85.7%) | -             |
| If the ABPA / asthma diagnosis is uncertain.                               | Yes            | 19/37 (51.3%) |               |

|                                                                                                                                              |                                       |               |               |               |
|----------------------------------------------------------------------------------------------------------------------------------------------|---------------------------------------|---------------|---------------|---------------|
| If radiology is consistent with TB, to rule out TB, before corticosteroids are given.                                                        | Yes                                   | 22/37 (59.5%) |               |               |
| To collect samples for fungal culture, microscopy, and Aspergillus antigen/PCR.                                                              | Yes                                   | 14/37 (37.8%) |               |               |
| Only for therapeutic reasons, to remove mucus plugs.                                                                                         | Yes                                   | 21/37 (56.8%) |               |               |
| To investigate hemoptysis.                                                                                                                   | Yes                                   | 24/37 (64.9%) |               |               |
| Others                                                                                                                                       | Yes                                   | 5/37 (13.5%)  |               |               |
| <b>11. DIAGNOSTIC CRITERIA</b>                                                                                                               | Modifications suggested and discussed | 19/39 (48.7%) | 21/39 (53.8%) | 25/34 (73.5%) |
| <b>12. CLINICAL CLASSIFICATION</b>                                                                                                           |                                       | 20/34 (58.8%) | 29/34 (85.3%) | -             |
| <b>13. RADIOLOGICAL CLASSIFICATION</b>                                                                                                       |                                       | 18/34 (52.9%) | 21/34 (61.8%) | 30/34 (88.2%) |
| <b>14. TREATMENT OF ABPA</b>                                                                                                                 |                                       |               |               |               |
| Do you suggest treating asymptomatic or well-controlled asthmatics with ABPA using systemic medications (oral glucocorticoids or triazoles)? | No                                    | 30/35 (85.7%) | -             | -             |
| What first-line treatment do you suggest for managing new cases of ABPA?                                                                     | Prednisolone                          | 25/32 (78.1%) | -             | -             |
|                                                                                                                                              | Itraconazole                          | 19/32 (59.4%) | 24/35 (68.6%) | 25/34 (73.5%) |
|                                                                                                                                              | Voriconazole                          | 7/32 (21.9%)  |               |               |
|                                                                                                                                              | Posaconazole                          | 1/32 (3.1%)   |               |               |
|                                                                                                                                              | Isavuconazole                         | 1/32 (3.1%)   |               |               |
|                                                                                                                                              | Prednisolone-itraconazole combination | 9/32 (28.1%)  |               |               |
|                                                                                                                                              | Prednisolone-voriconazole combination | 1/32 (3.1%)   |               |               |
|                                                                                                                                              | Nebulized amphotericin                | 1/32 (3.1%)   |               |               |
|                                                                                                                                              | Biologics (anti-IgE, anti-type 2)     | 1/32 (3.1%)   |               |               |
|                                                                                                                                              | High-dose ICS                         | 0             |               |               |
| What treatment do you suggest in those with contraindications to glucocorticoids?                                                            | Itraconazole                          | 33/39 (84.6%) | -             | -             |
|                                                                                                                                              | Voriconazole                          | 22/39 (56.4%) |               |               |
|                                                                                                                                              | Posaconazole                          | 9/39 (23.1%)  |               |               |
|                                                                                                                                              | Isavuconazole                         | 4/39 (10.3%)  |               |               |
|                                                                                                                                              | Nebulized amphotericin                | 7/39 (17.9%)  |               |               |
|                                                                                                                                              | Biologics (anti-IgE, anti-type 2)     | 17/39 (43.6%) |               |               |
| What treatment do you suggest in                                                                                                             | Prednisolone                          | 28/39 (71.8%) | -             | -             |

|                                                                                                                                                                                 |                                       |               |               |               |
|---------------------------------------------------------------------------------------------------------------------------------------------------------------------------------|---------------------------------------|---------------|---------------|---------------|
| those with contraindications to azoles?                                                                                                                                         | Nebulized amphotericin                | 18/39 (46.2%) |               |               |
|                                                                                                                                                                                 | Biologics (anti-IgE, anti-type 2)     | 18/39 (46.2%) |               |               |
| What treatment do you suggest for managing ABPA during pregnancy?                                                                                                               | Prednisolone                          | 27/37 (73%)   | -             | -             |
|                                                                                                                                                                                 | Itraconazole                          | 0             |               |               |
|                                                                                                                                                                                 | Voriconazole                          | 0             |               |               |
|                                                                                                                                                                                 | Posaconazole                          | 0             |               |               |
|                                                                                                                                                                                 | Isavuconazole                         | 0             |               |               |
|                                                                                                                                                                                 | Prednisolone-itraconazole combination | 1 (2.7%)      |               |               |
|                                                                                                                                                                                 | Prednisolone-voriconazole combination | 0             |               |               |
|                                                                                                                                                                                 | Nebulized amphotericin                | 8/37 (21.6%)  |               |               |
|                                                                                                                                                                                 | Biologics (anti-IgE, anti-type 2)     | 5/37 (13.5%)  |               |               |
| What dosing protocol would you recommend for glucocorticoids in treating ABPA?                                                                                                  |                                       |               |               |               |
| Oral prednisolone: 0.5 mg/kg/d, 0.25 mg/kg/d, 0.125 mg/kg/d, each, for 4 weeks; then taper by 5 mg/week to complete four months.                                                | Yes                                   | 19/34 (55.9%) | 21/35 (60.0%) | 25/35 (71.4%) |
| Oral prednisolone 0.5 mg/kg/day for two weeks followed by 0.5 mg/kg/day for alternate days for eight weeks. Then taper by 5 mg every two weeks and discontinue over 3-5 months. | Yes                                   | 10/34 (29.4%) | 14/35 (40.0%) | 10/35 (28.6%) |
| Any other protocol                                                                                                                                                              | Yes                                   | 5/34 (14.7%)  | -             | -             |
| What should be the dosing protocol for azoles in treating ABPA?                                                                                                                 |                                       |               |               |               |
| Itraconazole (or Voriconazole) 200 mg bid for 4 months                                                                                                                          | Yes                                   | 29/34 (85.3%) | -             | -             |
| Do you suggest therapeutic drug monitoring while using antifungal azoles?                                                                                                       | Yes                                   | 32/35 (91.4%) | -             | -             |
| When to assess treatment response?                                                                                                                                              | 4 weeks                               | 5/35 (14.3%)  | 8 (20.5%)     |               |
|                                                                                                                                                                                 | 6 weeks                               | 9/35 (25.7%)  | 8 (20.5%)     |               |
|                                                                                                                                                                                 | 8 weeks                               | 9/35 (25.7%)  | 16 (41.0%)    |               |
|                                                                                                                                                                                 | 12 weeks                              | 12/35 (34.3%) | 5 (12.8%)     |               |
| How do you recommend assessing                                                                                                                                                  | Symptoms                              | 36/36 (100%)  | -             | -             |

|                                                                                    |                                           |               |               |                                           |
|------------------------------------------------------------------------------------|-------------------------------------------|---------------|---------------|-------------------------------------------|
| response to treatment (choose more than one if required)?                          | Chest radiograph (chest imaging)          | 19/36 (52.8%) | 22/35 (62.9%) | -                                         |
|                                                                                    | CT chest                                  | 12/36 (33.3%) | 10/35 (28.6%) | -                                         |
|                                                                                    | Serum total IgE                           | 33/36 (91.7%) | -             | -                                         |
|                                                                                    | Serum <i>A. fumigatus</i> specific IgE    | 0             | -             | -                                         |
|                                                                                    | Serum <i>A. fumigatus</i> specific IgG    | 0             | -             | -                                         |
|                                                                                    | Peripheral blood eosinophil count         | 13/36 (36.4%) | 12/35 (34.2%) | 9/34 (26.4%)                              |
|                                                                                    | Spirometry                                | 25/36 (69.4%) | -             | -                                         |
|                                                                                    | HRQoL questionnaire                       | 22/36 (61.1%) | 25/35 (71.4%) | -                                         |
| How do you recommend diagnosing ABPA exacerbations in practice?                    | Clinical                                  | 0             | -             | -                                         |
|                                                                                    | Clinical and immunological                | 4/37 (10.8%)  | -             | -                                         |
|                                                                                    | Clinical and radiological                 | 0             | -             | -                                         |
|                                                                                    | Clinical, radiological, and immunological | 33/37 (89.2%) | -             | -                                         |
| What would you recommend for treating the first ABPA exacerbations?                | Prednisolone                              | 25/35 (71.4%) | -             | -                                         |
|                                                                                    | Itraconazole                              | 12/35 (34.3%) | -             | -                                         |
|                                                                                    | Voriconazole                              | 7/35 (20.0%)  | -             | -                                         |
|                                                                                    | Posaconazole                              | 0             | -             | -                                         |
|                                                                                    | Isavuconazole                             | 0             | -             | -                                         |
|                                                                                    | Prednisolone-itraconazole combination     | 16/35 (45.7%) | -             | -                                         |
|                                                                                    | Prednisolone-voriconazole combination     | 3/35 (8.6%)   | -             | -                                         |
|                                                                                    | Nebulized amphotericin                    | 0             | -             | -                                         |
| Biologics (anti-IgE, anti-type 2)                                                  | 2/35 (5.7%)                               | -             | -             |                                           |
| What do you recommend for treating the subsequent ABPA exacerbations? <sup>a</sup> | Prednisolone                              | 11/35 (31.4%) | 3/36 (16.7%)  | -                                         |
|                                                                                    | Itraconazole                              | 8/35 (22.9%)  | 4/36 (11.1%)  | -                                         |
|                                                                                    | Voriconazole                              | 5/35 (14.3%)  | 1/36 (2.8%)   | -                                         |
|                                                                                    | Posaconazole                              | 0             | -             | -                                         |
|                                                                                    | Isavuconazole                             | 0             | -             | -                                         |
|                                                                                    | Prednisolone-itraconazole combination     | 23/35 (65.7%) | 21/36 (58.3%) | 25/35 (71.4)                              |
|                                                                                    | Prednisolone-voriconazole combination     | 9/35 (25.7%)  | 5/36 (13.9%)  | -                                         |
|                                                                                    | Nebulized amphotericin                    | 3/35 (8.6%)   | 1/36 (2.8%)   | -                                         |
| Biologics (anti-IgE, anti-type 2)                                                  | 11/35 (31.4%)                             | 2/36 (5.6%)   | -             |                                           |
| What should be the optimal duration for treating ABPA exacerbations?               | 2 months                                  | 3/34 (8.8%)   | 10/36 (27.8%) | 32/32 (100%) for assessment at 8-12 weeks |
|                                                                                    | 3 months                                  | 6/34 (17.6%)  | 12/36 (33.3%) |                                           |
|                                                                                    | 4 months                                  | 16/34 (47.1%) | 9/36 (25%)    |                                           |
|                                                                                    | 6 months                                  | 7/34 (20.6%)  | 5/36 (13.9%)  |                                           |
|                                                                                    | others (please specify duration)          | 2/34 (5.9%)   | 0             |                                           |
| Do you recommend using biological agents for treating ABPA in your                 |                                           |               |               |                                           |



|                                                                                                                                                                    |                              |               |               |
|--------------------------------------------------------------------------------------------------------------------------------------------------------------------|------------------------------|---------------|---------------|
| practice?                                                                                                                                                          | Yes                          | 28/34 (82.4%) | -             |
| Omalizumab                                                                                                                                                         | Yes                          | 25/30 (83.3%) | 26/33 (78.8%) |
| Mepolizumab                                                                                                                                                        | Yes                          | 19/30 (63.3%) | 14/31 (45.2%) |
| Benralizumab                                                                                                                                                       | Yes                          | 18/30 (60.0%) | 17/32 (53.1%) |
| Dupilumab                                                                                                                                                          | Yes                          | 16/30 (53.3%) | 15/29 (51.7%) |
| Tezepelumab                                                                                                                                                        | Yes                          | 7/30 (23.3%)  | 6/27 (22.2%)  |
| If yes, please suggest the indications for biologics:                                                                                                              |                              |               |               |
| New ABPA cases                                                                                                                                                     | Yes                          | 1/32 (3.1%)   | -             |
| ABPA exacerbations                                                                                                                                                 | Yes                          | 5/32 (15.6%)  |               |
| For treatment dependent ABPA as maintenance therapy after response                                                                                                 | Yes                          | 23/32 (71.9%) |               |
| Contraindications to oral glucocorticoids                                                                                                                          | Yes                          | 26/32 (81.2%) |               |
| Contraindications to oral azoles                                                                                                                                   | Yes                          | 23/32 (71.9%) |               |
| Intolerance to oral azoles                                                                                                                                         | Yes                          | 24/32 (75.0%) |               |
| Do you suggest using nebulized amphotericin B (NAB) for ABPA?                                                                                                      | Yes                          | 18/33 (54.5%) | 15/35 (42.9%) |
| Where do you suggest using NAB?                                                                                                                                    |                              |               |               |
| New ABPA cases                                                                                                                                                     | Yes                          | 0             |               |
| ABPA exacerbations                                                                                                                                                 | Yes                          | 1/27 (3.7%)   | -             |
| Treatment-dependent ABPA as maintenance therapy after response                                                                                                     | Yes                          | 10/27 (37.0%) |               |
| Contraindications to oral glucocorticoids                                                                                                                          | Yes                          | 7/27 (25.9%)  |               |
| Contraindications to oral azoles                                                                                                                                   | Yes                          | 16/27 (59.3%) |               |
| Intolerance to oral azoles                                                                                                                                         | Yes                          | 16/27 (59.3%) |               |
| Would you recommend routinely treating all patients of serologic ABPA (ABPA without bronchiectasis) with systemic medications (oral glucocorticoids or triazoles)? | No                           | 26/34 (76.4%) | -             |
| If yes, when                                                                                                                                                       | Severe asthma                | 27/34 (79.4%) | -             |
|                                                                                                                                                                    | Recurrent ABPA exacerbations | 29/34 (85.3%) | -             |

|                                                 | Any other                |   |   |              |
|-------------------------------------------------|--------------------------|---|---|--------------|
| Management options for treatment dependent ABPA | Long term itraconazole   | - | - | 31/31 (100%) |
|                                                 | Biologics                |   |   | 22/31 (71%)  |
|                                                 | Nebulized amphotericin B |   |   | 31/31 (100%) |

All values are presented as numbers (percentage) unless otherwise specified.

<sup>a</sup>Multiple options allowed in the first round of Delphi

Table S3: Detailed imaging acquisition protocol for chest computed tomography (CT)

| Parameters                                                                                                                                                                                                                                                                                                                                                                                                                                                                    | CT chest                                                                                                    |
|-------------------------------------------------------------------------------------------------------------------------------------------------------------------------------------------------------------------------------------------------------------------------------------------------------------------------------------------------------------------------------------------------------------------------------------------------------------------------------|-------------------------------------------------------------------------------------------------------------|
| Scanning mode                                                                                                                                                                                                                                                                                                                                                                                                                                                                 | Helical                                                                                                     |
| Patient position                                                                                                                                                                                                                                                                                                                                                                                                                                                              | Supine, in deep suspended inspiration                                                                       |
| Scan area                                                                                                                                                                                                                                                                                                                                                                                                                                                                     | The whole chest (from apices to domes of the diaphragm)                                                     |
| Scan acquisition                                                                                                                                                                                                                                                                                                                                                                                                                                                              | Volumetric, non-contrast                                                                                    |
| Tube potential (kVp)                                                                                                                                                                                                                                                                                                                                                                                                                                                          | Appropriate to patient size; 120 (standard) and lower tube potential for small, thin, or pediatric patients |
| Tube current (mA)                                                                                                                                                                                                                                                                                                                                                                                                                                                             | <200, AEC modulated mA is preferred over fixed mA                                                           |
| Collimation                                                                                                                                                                                                                                                                                                                                                                                                                                                                   | Thinnest possible (e.g., 0.6 mm)                                                                            |
| Slice thickness, millimeter                                                                                                                                                                                                                                                                                                                                                                                                                                                   | 0.625-1.5                                                                                                   |
| Scan (rotation) time, seconds                                                                                                                                                                                                                                                                                                                                                                                                                                                 | Shortest possible (<0.5s)                                                                                   |
| Pitch                                                                                                                                                                                                                                                                                                                                                                                                                                                                         | 0.75-1.5                                                                                                    |
| Matrix                                                                                                                                                                                                                                                                                                                                                                                                                                                                        | 512 x 512                                                                                                   |
| Reconstruction technique                                                                                                                                                                                                                                                                                                                                                                                                                                                      | IR blended with FBP (when available), else FBP                                                              |
| Reconstruction algorithm/kernel/filter                                                                                                                                                                                                                                                                                                                                                                                                                                        | High spatial resolution (also called sharp/bone) algorithm                                                  |
| Window level/width                                                                                                                                                                                                                                                                                                                                                                                                                                                            | Lung window: -600 to -700 HU/1000-1500 HU;<br>mediastinal window: 50/350 HU                                 |
| Post Processing                                                                                                                                                                                                                                                                                                                                                                                                                                                               | MPR, MIP, minIP or VRT                                                                                      |
| Effective Radiation Dose                                                                                                                                                                                                                                                                                                                                                                                                                                                      | 3-7 mSv                                                                                                     |
| <p>The acquired CT images are then reconstructed in the soft tissue window (20-30 kernel) and lung window (sharp/bone or high-spatial frequency algorithm, 60-80 kernel) with 0.625-1.25 mm slice thickness. The 60-80 kernel reconstruction becomes the high-resolution CT, without a need for separate non-sequential high-resolution CT scan, as was previously done. The post-processing of the acquired volumetric CT data can be performed on various workstations.</p> |                                                                                                             |

AEC = Automated exposure control, IR = Iterative reconstruction, FBP = filtered back projection, MPR = multiplanar reconstruction, MIP = maximum intensity projection, minIP = minimum intensity projection, VRT = volume rendered technique

Figure S1: Use of sputum eosinophil counts to choose drug therapy in allergic bronchopulmonary aspergillosis (ABPA) patients with exacerbation of respiratory symptoms

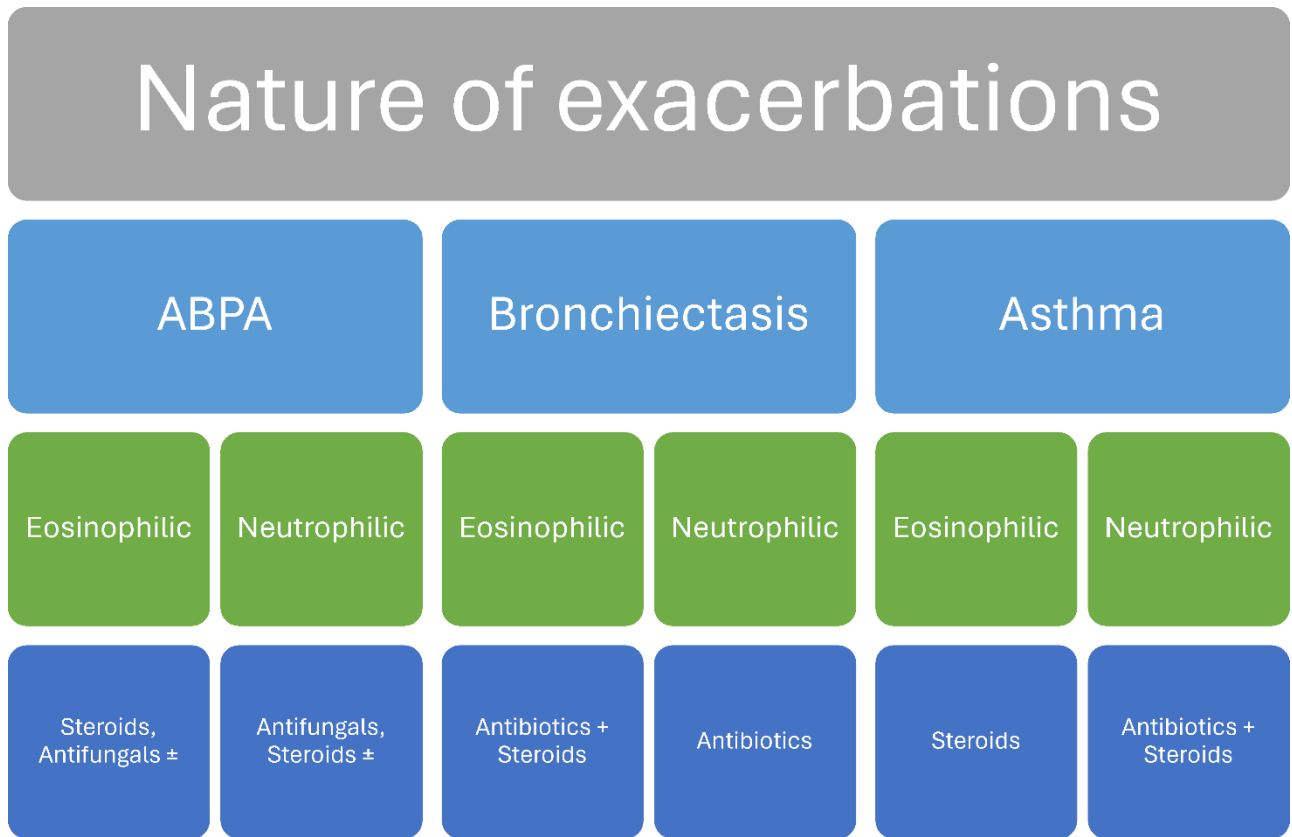

Supplement: ERJ-00061-2024.Supplement.pdf [file ERJ-00061-2024.Supplement.pdf]
